# Supplementary material for: Gram-scale fermentative production of ergothioneine driven by overproduction of cysteine in Escherichia coli
Source: PubMed Central journal article supplement (PMC6374457; doi:10.1038/s41598-018-38382-w), 2019-02-13
Supplement: 41598_2018_38382_MOESM1_ESM.pdf [file 41598_2018_38382_MOESM1_ESM.pdf]

1 **Supplementary Information**

2  
3 **Gram-scale fermentative production of ergothioneine driven by overproduction of**  
4 **cysteine in *Escherichia coli*.**

5  
6 Naoyuki Tanaka<sup>1</sup>, Yusuke Kawano<sup>1</sup>, Yasuharu Satoh<sup>2</sup>, Tohru Dairi<sup>2</sup> and Iwao Ohtsu<sup>1\*</sup>

7  
8 <sup>1</sup>*Graduate School of Life and Environmental Sciences, University of Tsukuba, 1-1-1*  
9 *Tennodai, Tsukuba, Ibaraki, 305-8577, Japan*

10 <sup>2</sup>*Graduate School of Engineering, Hokkaido University, N13 & W8, Kita-ku, Sapporo,*  
11 *Hokkaido 060-8628, Japan.*

12  
13 \* Corresponding author

14  
15 **Figure S1. Sulfur assimilation pathways in *E. coli*.** p2

16 **Figure S2. Cys production in *E. coli*.** p3

17 **Figure S3. ERG production in  $\Delta gshB$  background.** p4

18 **Figure S4. Effect of supplementation with iron on ERG productivity.** p5

19  
20

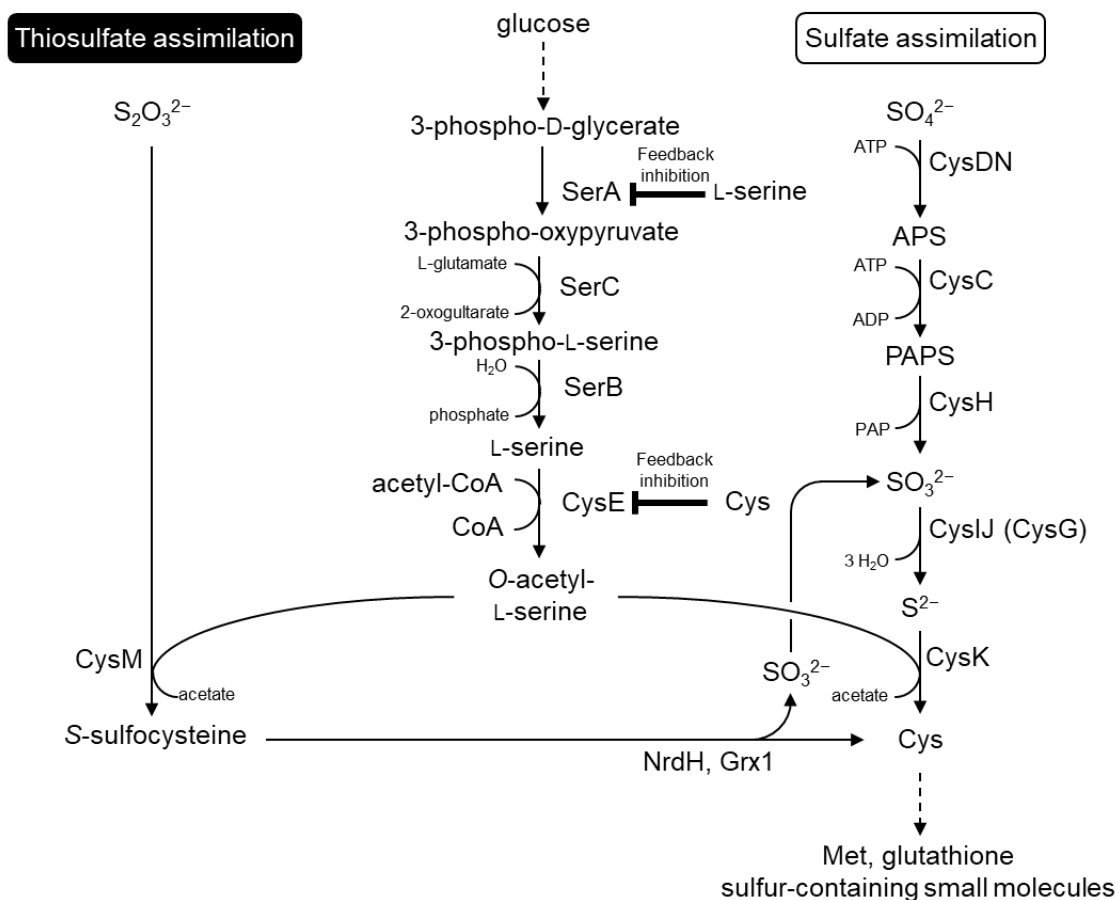

21

22 **Figure S1. Sulfur assimilation pathways in *E. coli*.**

23 *E. coli* possesses two pathways for sulfur assimilation: one is sulfate pathway, the other  
 24 is thiosulfate pathway. In both pathways, the carbon metabolite accepting the sulfur atom  
 25 is commonly *O*-acetyl-L-serine. In the sulfate pathway, *O*-acetyl-L-serine sulfhydrylase  
 26 A (CysK) catalyzes the conversion of *O*-acetyl-L-serine and sulfide into Cys. In the  
 27 thiosulfate pathway, *O*-acetyl-L-serine sulfhydrylase B (CysM) catalyzes the conversion  
 28 of *O*-acetyl-L-serine and thiosulfate into *S*-sulfocysteine. *S*-sulfocysteine is subsequently  
 29 metabolized into Cys by NrdH and Grx1, and the simultaneously released sulfite is also  
 30 assimilated into another Cys via the sulfate pathway. SerA and CysE are controlled  
 31 through feedback inhibition by serine and Cys, respectively.  $S_2O_3^{2-}$ , thiosulfate;  $SO_4^{2-}$ ,  
 32 sulfate;  $SO_3^{2-}$ , sulfite;  $S^{2-}$ , sulfide; APS, adenosine 5'-phosphosulfate; PAPS, 3'-  
 33 phosphoadenosine 5'-phosphosulfate; Grx, glutaredoxin.

34

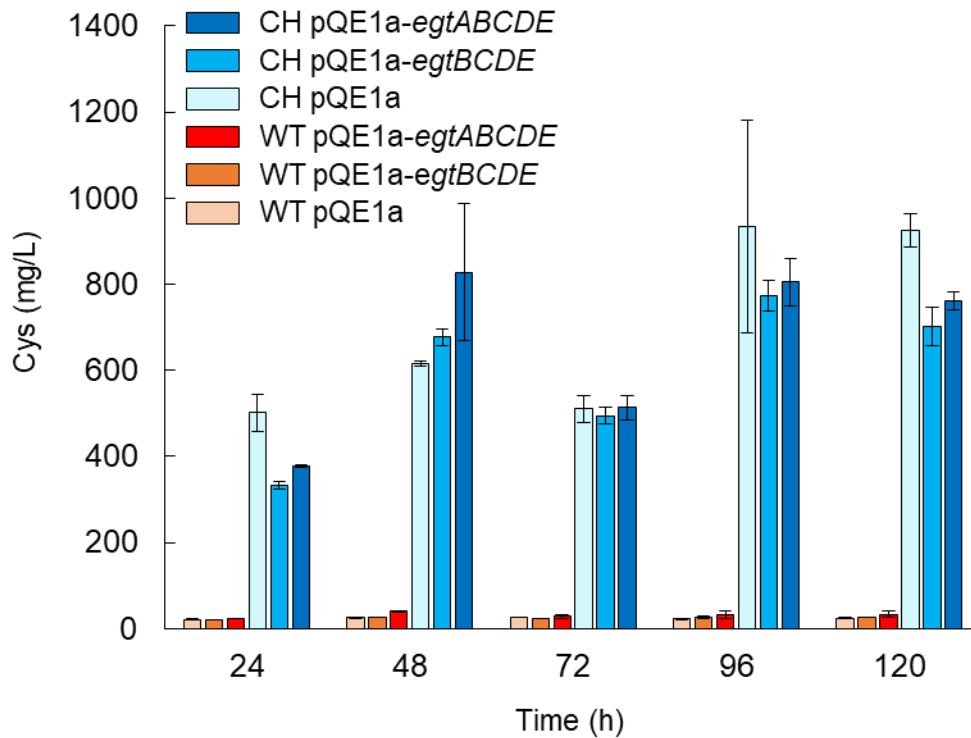

35

36 **Figure S2. Cys production in *E. coli*.**

37 WT and CH harboring each of plasmids (pQE1a, pQE1a-*egtBCDE*, pQE1a-*egtABCDE*)  
 38 were cultured in SM1 liquid medium. After 6 h cultivation, IPTG and Na<sub>2</sub>S<sub>2</sub>O<sub>3</sub> were  
 39 added at concentrations of 0.1 mM and 10 mM respectively. Cys in the cultured  
 40 supernatant was determined by Gaitonde's method (described in Methods). Data are  
 41 presented as mean values with standard errors from three independent experiments.  
 42 pACYC184 as negative control for pCys<sup>HP</sup> was introduced into WT.

43

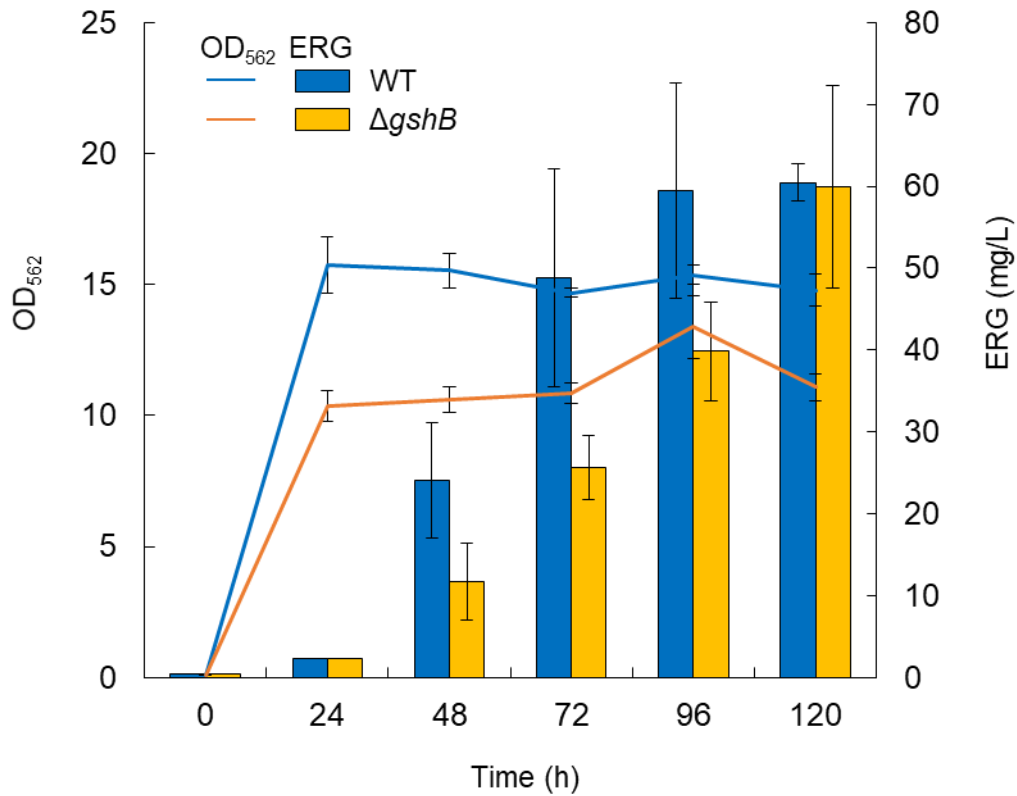

44

45 **Figure S3. ERG production in  $\Delta gshB$  background.**

46 WT and  $\Delta gshB$  cells harboring pCys<sup>HP</sup> and pQE1a-*egtABCDE* were cultured in SM1  
 47 liquid medium. After 6 h cultivation, IPTG and Na<sub>2</sub>S<sub>2</sub>O<sub>3</sub> were added at concentrations of  
 48 0.1 mM and 10 mM respectively. Cell density was estimated from the OD at 562 nm.  
 49 ERG in the cultured supernatant was quantified by Sulfur index analysis described in  
 50 Methods.

51

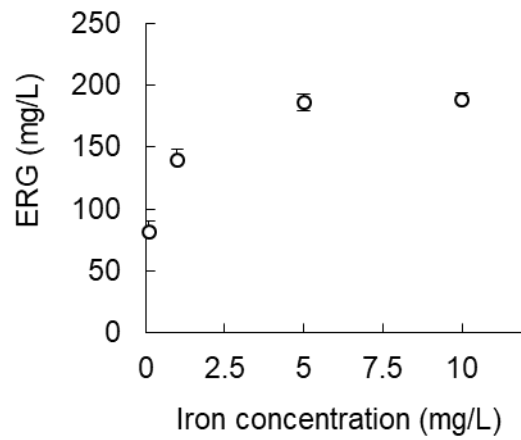

52

53 **Figure S4. Effect of supplementation with iron on ERG productivity.**

54 *CH ΔmetJ pQE1a-egtABCDE* cells were cultured in SM1 liquid medium which contained  
55 AFC at various concentrations (0.1, 1, 5, 10 mg/L). After 6 h cultivation, IPTG and  
56 Na<sub>2</sub>S<sub>2</sub>O<sub>3</sub> were supplied at concentrations of 0.1 mM and 10 mM, respectively. ERG in  
57 the cultured supernatant at 120 h was quantified by Sulfur index analysis described in  
58 Methods.

59

60
